# Supplementary material
Source: Springer Nature journal article supplement (https://www.springermedizin.de/resource/supplementary/12985_2013_2428_MOESM2_ESM.pdf/9607060)

## A. Three-line strip

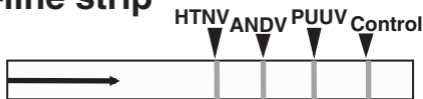

HFRS patient

NE patient

NE patient

HPS patient

HPS patient

Healthy

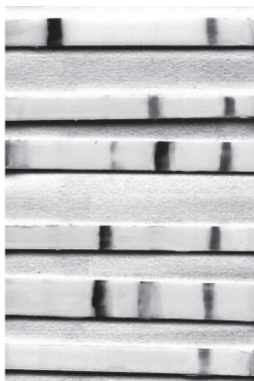

## B. Mixed-line strip

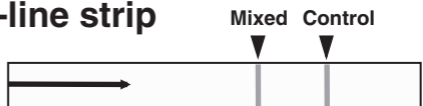

HFRS patient

NE patient

HPS patient

Healthy

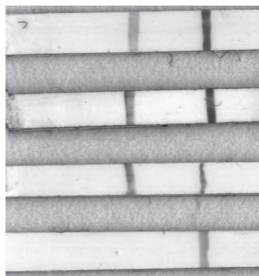

Supplement: MOESM2 [file 9607060]
